# Supplementary material
Source: publisher figshare collection journal article supplement (https://springernature.figshare.com/ndownloader/files/18037061)
Supplement: Supplementary file 1 [file 18037061]

## Sheet: Table S1
Table S1: G. hirsutum TALE superfamily genes and its orthologues in Gb, Ga and Gr cotton genomes.
Gene ID	Gene name of G.hirsutum	Homologs of G.barbadense	Homologs of G.arboreum	Homologs of G.raimondii
BEL1-Like family
Gh_A07G2327	GhATH1-A07	GOBAR_AA28867	Cotton_A_05613	Gorai.001G023100
Gh_D07G0194	GhATH1-D07	GOBAR_DD32448	Cotton_A_05613	Gorai.001G023100
Gh_A08G1004	GhBEL1-A08	GOBAR_AA00702	Cotton_A_35898	Gorai.004G139300
Gh_D08G1276	GhBEL1-D08	GOBAR_DD08298	Cotton_A_35898	Gorai.004G139300
Gh_A03G0158	GhBEL1-A03	GOBAR_AA33961	Cotton_A_11675	Gorai.003G156000
Gh_D03G1427	GhBEL1-D03	GOBAR_DD22176	Cotton_A_11675	Gorai.003G156000
Gh_A12G2682	GhBEL1-A12	None	Cotton_A_32708	Gorai.008G248900
Gh_D12G2283	GhBEL1-D12	GOBAR_DD33926	Cotton_A_32708	Gorai.008G248900
Gh_A09G1263	GhBLH1-A09	GOBAR_AA08170	Cotton_A_13481	Gorai.006G149100
Gh_D09G1263	GhBLH1-D09	GOBAR_DD29562	Cotton_A_13481	Gorai.006G149100
Gh_A07G1033	GhBLH5-A07	GOBAR_AA11678	Cotton_A_35263	Gorai.001G125400
Gh_D07G1112	GhBLH5-D07	GOBAR_DD02537	Cotton_A_35263	Gorai.001G125400
Gh_A04G0478	GhBLH1-A04	GOBAR_AA17520	Cotton_A_39756	Gorai.009G396900
Gh_D04G0880	GhBLH1-D04	GOBAR_DD01341	Cotton_A_39756	Gorai.009G396900
Gh_A05G0639	GhBLH5-A05	GOBAR_AA21453	Cotton_A_11086	Gorai.009G082700
Gh_D05G0788	GhBLH5-D05	GOBAR_DD29867	Cotton_A_11086	Gorai.009G082700
Gh_A01G1715	GhBLH1-A01	GOBAR_AA21686	Cotton_A_02285	Gorai.002G234900
Gh_D01G1966	GhBLH1-D01	GOBAR_DD00460	Cotton_A_02285	Gorai.002G234900
Gh_A09G0940	GhBLH5-A09	GOBAR_AA39171	Cotton_A_30275	Gorai.006G115600
Gh_D09G0967	GhBLH5-D09	GOBAR_DD12193	Cotton_A_30275	Gorai.006G115600
Gh_A05G1633	GhBLH11-A05	GOBAR_AA23983	Cotton_A_07844	Gorai.009G198500
Gh_D05G1815	GhBLH11-D05	GOBAR_DD21207	Cotton_A_07844	Gorai.009G198500
Gh_A06G1844	GhBLH11-A06	GOBAR_AA33285	Cotton_A_36823	Gorai.010G007700
Gh_D06G0029	GhBLH11-D06	GOBAR_DD23547	Cotton_A_36823	Gorai.010G007700
Gh_A11G1730	GhBLH2-A11	GOBAR_AA18167	Cotton_A_33133	Gorai.007G207200
Gh_D11G1889	GhBLH2-D11	GOBAR_DD37788	Cotton_A_33133	Gorai.007G207200
Gh_A12G0624	GhBLH2-A12	GOBAR_AA11795	Cotton_A_34090	Gorai.008G070800
Gh_D12G0641	GhBLH2-D12	GOBAR_DD11471	Cotton_A_34090	Gorai.008G070800
Gh_A02G1546	GhBLH4-A02	GOBAR_AA24576	Cotton_A_01649	Gorai.003G018100
Gh_D03G0175	GhBLH4-D03	GOBAR_DD29752	Cotton_A_01649	Gorai.003G018100
Gh_A03G1738	GhBLH6-A03	GOBAR_AA14703	Cotton_A_00715	Gorai.005G246400
Gh_D02G2171	GhBLH6-D02	GOBAR_DD03846	Cotton_A_00715	Gorai.005G246400
Gh_A12G0390	GhBLH6-A12	GOBAR_AA33051, GOBAR_AA03086	Cotton_A_27212	Gorai.008G031100
Gh_D12G0275	GhBLH6-D12	GOBAR_DD00283	Cotton_A_27212	Gorai.008G031100
Gh_A13G2086	GhBLH6-A13	GOBAR_AA14143	Cotton_A_19739	Gorai.013G034600
Gh_D13G0314	GhBLH6-D13	GOBAR_DD28219	Cotton_A_19739	Gorai.013G034600
Gh_A06G1845	GhBLH7-A06	None	Cotton_A_36822	Gorai.010G007800
Gh_D06G0030	GhBLH7-D06	GOBAR_DD23550	Cotton_A_36822	Gorai.010G007800
Gh_A05G0912	GhBLH8-A05	GOBAR_AA22340	Cotton_A_27417	Gorai.009G109300
Gh_D05G0993	GhBLH8-D05	GOBAR_DD34488	Cotton_A_27417	Gorai.009G109300
Gh_A03G0263	GhBLH8-A03	None	Cotton_A_04252	Gorai.003G143600
Gh_Sca004991G01	GhBLH8-D03	GOBAR_DD24510	Cotton_A_04252	Gorai.003G143600
Gh_A01G1895	GhBLH9-A01	GOBAR_AA33911	Cotton_A_00390	Gorai.002G255800
Gh_D01G2154	GhBLH9-D01	GOBAR_DD02893	Cotton_A_00390	Gorai.002G255800
Gh_A04G0732	GhBLH9-A04	GOBAR_AA37150	Cotton_A_22674	Gorai.012G108300
Gh_D04G1208	GhBLH9-D04	GOBAR_DD03529	Cotton_A_22674	Gorai.012G108300
Gh_A10G2018	GhBLH9-A10	GOBAR_AA01682	Cotton_A_25113	Gorai.011G271200
Gh_D10G2508	GhBLH9-D10	GOBAR_DD16505	Cotton_A_25113	Gorai.011G271200
Gh_A10G2019	GhBLH8-A10	None	None	Gorai.011G271900
Gh_D10G2509	GhBLH8-D10	None	None	Gorai.011G271900
KNOX family
Gh_A05G1484	GhSTM-A05	GOBAR_AA36187	Cotton_A_04656	Gorai.009G181500
Gh_D05G1655	GhSTM-D05	GOBAR_DD22862	Cotton_A_04656	Gorai.009G181500
Gh_A06G1334	GhSTM-A06	GOBAR_AA07614	Cotton_A_33973	Gorai.010G183800
Gh_D06G1663	GhSTM-D06	GOBAR_DD06571	Cotton_A_33973	Gorai.010G183800
Gh_A10G0104	GhSTM-A10	GOBAR_AA39074	Cotton_A_08468	Gorai.011G011700
Gh_D10G0108	GhSTM-D10	GOBAR_DD25125	Cotton_A_08468	Gorai.011G011700
Gh_A02G0822	GhKNAT1-A02	GOBAR_AA05463	Cotton_A_34157	Gorai.005G098100
Gh_D02G0870-871	GhKNAT1-D02	GOBAR_DD00010	Cotton_A_34157	Gorai.005G098100
Gh_A06G1864	GhKNAT1-A06	GOBAR_AA12213	Cotton_A_25268, Cotton_A_25269	Gorai.010G029000
Gh_D06G0225	GhKNAT1-D06	GOBAR_DD30120	Cotton_A_25268, Cotton_A_25269	Gorai.010G029000
Gh_A05G1857	GhKNAT1-A05	GOBAR_AA21503	Cotton_A_27818	Gorai.009G223200
Gh_D05G2055	GhKNAT1-D05	GOBAR_DD32894	Cotton_A_27818	Gorai.009G223200
Gh_A12G2447	GhKNATM-A12	GOBAR_AA23908	None	Gorai.008G291600
Gh_D12G2573	GhKNATM-D12	GOBAR_DD19507	None	Gorai.008G291600
Gh_A05G0463	GhKNAT3-A05	GOBAR_AA27671	Cotton_A_01196	Gorai.009G060200
Gh_D05G3920	GhKNAT3-D05	GOBAR_DD02617	Cotton_A_01196	Gorai.009G060200
Gh_A06G0906	GhKNAT3-A06	None	Cotton_A_28247	Gorai.010G117100
Gh_D06G1066	GhKNAT3-D06	None	Cotton_A_28247	Gorai.010G117100
Gh_A07G0245	GhKNAT3-A07	GOBAR_AA35739	Cotton_A_19190	Gorai.001G035700
Gh_D07G0302	GhKNAT3-D07	GOBAR_DD18715	Cotton_A_19190	Gorai.001G035700
Gh_A13G1595	GhKNAT3-A13	GOBAR_AA38245	Cotton_A_09092	Gorai.013G213900
Gh_D13G1956	GhKNAT3-D13	GOBAR_DD34318	Cotton_A_09092	Gorai.013G213900
Gh_A05G0046	GhKNAT4-A05	GOBAR_AA27727	Cotton_A_11503	Gorai.009G012300
Gh_D05G0099	GhKNAT4-D05	GOBAR_DD23558	Cotton_A_11503	Gorai.009G012300
Gh_A06G0419	GhKNAT4-A06	GOBAR_AA33210	Cotton_A_08384	Gorai.010G056100
Gh_D06G0457	GhKNAT4-D06	GOBAR_DD04702	Cotton_A_08384	Gorai.010G056100
Gh_A03G1199	GhKNAT6-A03	GOBAR_AA07985	Cotton_A_23799	Gorai.005G180500
Gh_D02G1633	GhKNAT6-D02	GOBAR_DD32225	Cotton_A_23799	Gorai.005G180500
Gh_A05G2722	GhKNAT6-A05	GOBAR_AA00193	Cotton_A_33669	Gorai.009G336900
Gh_D05G3025	GhKNAT6-D05	GOBAR_DD05999	Cotton_A_33669	Gorai.009G336900
Gh_A12G2495	GhKNAT6-A12	GOBAR_AA33085	Cotton_A_26598	Gorai.008G296800
Gh_D12G2623	GhKNAT6-D12	GOBAR_DD30937	Cotton_A_26598	Gorai.008G296800
Gh_A03G2005	GhKNAT7-A03	GOBAR_AA11540	Cotton_A_28415	Gorai.003G163800
Gh_D03G1492	GhKNAT7-D03	GOBAR_DD28784	Cotton_A_28415	Gorai.003G163800
Gh_A08G1599	GhKNAT7-A08	GOBAR_AA33946	Cotton_A_09961	Gorai.004G206600
Gh_D08G1910	GhKNAT7-D08	GOBAR_DD12226	Cotton_A_09961	Gorai.004G206600
Gh_A12G2049	GhKNAT7-A12	GOBAR_AA16681	Cotton_A_14429	Gorai.008G242800
Gh_D12G2227	GhKNAT7-D12	GOBAR_DD31062	Cotton_A_14429	Gorai.008G242800
Gh_A08G1820	GhKNAT2-A08	GOBAR_AA30690	Cotton_A_18479	Gorai.004G236400
Gh_D08G2181	GhKNAT2-D08	GOBAR_DD31327	Cotton_A_18479	Gorai.004G236400
Gh_A11G2492	GhKNAT2-A11	GOBAR_AA37828	Cotton_A_10669	Gorai.007G306500
Gh_D11G2813	GhKNAT2-D11	GOBAR_DD19691	Cotton_A_10669	Gorai.007G306500
Gh_A13G0926	GhKNAT2-A13	GOBAR_AA28519	Cotton_A_34107	Gorai.013G129400
Gh_D13G1173	GhKNAT2-D13	GOBAR_DD07053	Cotton_A_34107	Gorai.013G129400
None: No homologs in this Gossypium specie
